# Supplementary material for: Toxic Effects of Two Representative Rare Earth Elements (La and Gd) on Danio rerio Based on Transcriptome Analysis
Source: MDPI journal article supplement (doi:10.3390/toxics10090519), 2022-08-31
Supplement: s1 [file s1]

# Supplementary Materials: Toxic Effects of Two Representative Rare Earth Elements (La and Gd) on Danio Rerio Based on Transcriptome Analysis

Shu Kang, Cheng Guo, Chenyang Xue, Chenshu Ma, Huaizhong Mu and Lizong Sun

**Table S1.** Molarity of each ion in the standard water.

| Standard Water <sup>a</sup> | Cations (mmol·L <sup>-1</sup> ) |                  |                 |                | Anions (mmol·L <sup>-1</sup> ) |                 |                               | Hardness <sup>b</sup> | pH      |
|-----------------------------|---------------------------------|------------------|-----------------|----------------|--------------------------------|-----------------|-------------------------------|-----------------------|---------|
|                             | Ca <sup>2+</sup>                | Mg <sup>2+</sup> | Na <sup>+</sup> | K <sup>+</sup> | HCO <sub>3</sub> <sup>-</sup>  | Cl <sup>-</sup> | SO <sub>4</sub> <sup>2-</sup> |                       |         |
|                             | 2.0                             | 0.5              | 0.8             | 0.08           | 0.8                            | 4.08            | 0.5                           | 250                   | 7.5–7.8 |

a: based on the OECD 203 and GB/T13267-91.

b: hardness is calculated by Ca<sup>2+</sup>-Mg<sup>2+</sup> content.

**Table S2.** Ammonia concentration (mg/L) measurements during 72 h acute toxicity.

| Exposure Concentration (μmol L <sup>-1</sup> ) | 0 | 24 h       | 48 h              | 72 h              |
|------------------------------------------------|---|------------|-------------------|-------------------|
| 0                                              | - | 0.03±0.005 | 0.04±0.006        | 0.02±0.006        |
| 20                                             | - | 0.04±0.004 | 0.05±0.015        | 0.05±0.007        |
| 40                                             | - | 0.08±0.012 | 0.07±0.013        | 0.08±0.010        |
| 80                                             | - | 0.10±0.021 | 0.08±0.017        | 0.06±0.014        |
| 160                                            | - | 0.07±0.016 | 0.03±0.011        | 0.01±0.002        |
| 320                                            | - | 0.06±0.014 | - (all fish dead) | - (all fish dead) |

-: not detected.

Total ammonia was measured according to the Nessler's Reagent Spectrophotometry method. The determination method referred to the previous studies [1–2].

**Table S3.** Primer sequences used in the experiment.

| Genes          | Full Name                                             | Primer Sequence (5'–3')                                    | Product Size (bp) |
|----------------|-------------------------------------------------------|------------------------------------------------------------|-------------------|
| <i>CDKA;1</i>  | Cyclin-dependent kinases A;1                          | F: CCTGTCAGGACATTTACTCATGAG<br>R: GCTTTTGCTGATCATCTCAGC    | 149               |
| <i>CDK2</i>    | Cyclin-dependent kinases 2                            | F: GTAGTAAGGTCTTCTGCAAGGCA<br>R: TGCCATTCCAACATATGTGC      | 138               |
| <i>GSTP2</i>   | Glutathione S-transferase protein 2                   | F: ACCATCCACCGTCATCTC<br>R: GCTCCTGTCGTTATTATTACTG         | 147               |
| <i>UGT5a1</i>  | Uridine 5'-diphosphate-glucuronyl transferase a1      | F: CTCAAAATCCCACGCTTCTTGTGG<br>R: CACGTCTACTACCTTTGGTTTCCC | 180               |
| <i>ALDH3B1</i> | aldehyde dehydrogenase 3 family, member B1            | F: TGGTGCTGGACATTTTCAGTCGG<br>R: CAAGAGCTTGCACTTCCATCATAG  | 198               |
| <i>PCNA1</i>   | Proliferation cell nuclear antigen 1                  | F: GTGACACAGTTGTGATCTCTG<br>R: ATCAACAATTGCATCTTCCGG       | 223               |
| <i>CYP1A</i>   | cytochrome P450, family 1, subfamily A, polypeptide 1 | F: GCAAACATCAGAGACCCCGA<br>R: TGCAAGCGACCTGATACTCC         | 167               |
| <i>CDC45</i>   | cell division cycle gene 45                           | F: TAGCCAATGCTCGCCATGAA<br>R: CGTCGGATTGAAATGACGGC         | 192               |
| <i>TP53</i>    | Tumor Protein 53                                      | F: TCTTTGATCTATAGGTTTCCGCCT<br>R: GGACCGGCTTGGTTGTTAGA     | 184               |
| <i>BRCA1</i>   | Breast cancer susceptibility1                         | F: GATTCGTCGTCTTGCTCGTAG<br>R: CAGTCACCGTCTTCTCTCTC        | 153               |
| <i>MRE11</i>   | MRE11 homolog, double strand break repair nuclease    | F: GTGATACACTTCGAGTACTTGTTGC<br>R: CTGACTACTTGAACTGCACTGG  | 167               |
| <i>MDM2</i>    | murine double minute2                                 | F: GTAACCATGTATTTTGCAATGCGTG                               | 256               |

|                          |                           |                                                     |     |
|--------------------------|---------------------------|-----------------------------------------------------|-----|
|                          |                           | R: GTGACGGATTATTCTGGCTAACG                          |     |
| <i>ACT2</i> <sup>#</sup> | House-keeping gene AtACT2 | F: TCGTGGATTCCAGCAGCTTCC<br>R: CCGATGGGCAAGTCATCACG | 105 |

<sup>#</sup>: To provide stable housekeeping genes for expression analysis of genes in zebrafish, eight commonly used plant internal reference genes (ACT1, ACT2, U6, aTUB1, eIF2, CYP, ACP, EF1α) [3]. were selected as candidate housekeeping genes based on the transcriptome data. qRT-PCR was used to detect the expression of these candidate genes in the muscle, liver, and gills of zebrafish. Then, the geometric average method (geNorm, average expression stability value, M) was used to analyze the expression stability of the candidate housekeeping genes [4].

**Table S4.** Analysis of the water quality of the solution during the toxicity test.

| Toxicity Test | Day | pH  | Temperature (°C) | DO (%ASV) | Weight (g) | Length (cm) | La (μmol L <sup>-1</sup> )     | Gd (μmol L <sup>-1</sup> )     |
|---------------|-----|-----|------------------|-----------|------------|-------------|--------------------------------|--------------------------------|
| 72 h          | 0   | 7.0 | 26               | 90        | -          | -           | 20; 40; 80; 160; 320           | 20; 40; 80; 160; 320           |
|               | 1   | 7.0 | 25.7             | 88        | -          | -           | 19.5; 38.2; 83.4; 154.3; 311.4 | 18.7; 41.6; 76.2; 153.7; 325.6 |
|               | 2   | 6.9 | 26.1             | 85        | -          | -           | 18.9; 37.7; 75.6; 152.4; 307.8 | 19.3; 37.6; 78.7; 154.3; 319.4 |
|               | 3   | 7.0 | 26.2             | 79        | -          | -           | 18.5; 37.2; 74.3; 151.7; 313.3 | 18.2; 36.7; 74.3; 149.6; 310.2 |
| 96 d          | 0   | 7.0 | 26               | 90        | 0.18       | 1.51        | 15; 30                         | 15; 30                         |
|               | 1   | 7.0 | 26.1             | 86        | -          | -           | 14.9; 30.2                     | 14.8; 29.4                     |
|               | 3   | 6.8 | 25.8             | 90        | -          | -           | 15.3; 28.7                     | 15.1; 30.7                     |
|               | 7   | 6.9 | 26.2             | 85        | -          | -           | 14.2; 28.5                     | 15.7; 28.1                     |
|               | 10  | 7.2 | 26.1             | 90        | -          | -           | 15.7; 31.2                     | 16.3; 32.1                     |
|               | 14  | 7.0 | 26               | 84        | -          | -           | 15.1; 28.4                     | 15.2; 30.4                     |
|               | 17  | 7.1 | 25.8             | 89        | -          | -           | 15.9; 31.6                     | 13.9; 32.3                     |
|               | 21  | 6.8 | 25.8             | 83        | -          | -           | 13.8; 27.5                     | 13.7; 31.2                     |
|               | 24  | 6.8 | 26.2             | 90        | -          | -           | 16.3; 32.2                     | 15.8; 30.6                     |
|               | 28  | 7.1 | 26.1             | 81        | 0.25       | 1.83        | 13.6; 27.6                     | 14.2; 28.3                     |

Mean values is shown ( $n = 3$ ); DO: dissolved oxygen; ASV: air saturation value; 0: Setting values; -: not measured.

**Table S5.** Gene ontology and gene symbol in zebra fish livers induced by La and Gd.

| Gene Ontology                           | P-Value              | Gene Symbol                                                                           |
|-----------------------------------------|----------------------|---------------------------------------------------------------------------------------|
| oxidation reduction                     | $1.4 \times 10^{-4}$ | <i>GSTP2, CYP1A, ZGC:64106, F5, GPX1B, CYP3A65, HSD11B2, CYP3C1L2</i>                 |
| DNA replication                         | $3.5 \times 10^{-6}$ | <i>CDC45, MRE11, PCNA1, dbf4b, fen1, chaf1a, mcm2, mcm3, mcm4, prim1, prim2</i>       |
| cell cycle                              | $2.8 \times 10^{-7}$ | <i>BRCA1, CDKA1, CDK2, WEE1, CDK4, E2F1, CYCB1;1, PCNA2, CCNA1, CCND1, ATM, BRCA1</i> |
| metabolism of xenobiotics by cytochrome | $3.1 \times 10^{-5}$ | <i>UGT5a1, ALDH3B1, PCK1, CPB1, A2M, APOA1, F5, COL10A1, CYP3A65, C1q, C7-1, EGR1</i> |
| mismatch repair                         | $3.5 \times 10^{-7}$ | <i>TP53, MDM2, RB1, ATM</i>                                                           |
| transport                               | $5.2 \times 10^{-4}$ | <i>APOA1, RBP2A, UCP4, FABP2, UCP2L, FABP1B, FABP6, SLC6A19</i>                       |
| signaling pathway                       | $3.5 \times 10^{-4}$ | <i>CCNG2, GADD45AL, ZGC:153369</i>                                                    |
| regulation of transcription             | $6 \times 10^{-3}$   | <i>EGR1, HER2, IRF2BP1, ZGC:77060</i>                                                 |
| signal transduction                     | $1.1 \times 10^{-5}$ | <i>PDK2, FGA, SI:RP71-57J15.4</i>                                                     |

## References

- Liu, Z.; Li, X.; Tai, P.; Sun, L.; Yang, X. Toxicity of ammonia, cadmium, and nitrobenzene to four local fishes in the Liao River, China and the derivation of site-specific water quality criteria. *Ecotoxicol. Environ. Saf.* **2017**, *147*, 656–663. <https://doi.org/10.1016/j.ecoenv.2017.09.008>.
- Liu, Z.; Tai, P.; Li, X.; Kong, L.; Matthews, T.G.; Lester, R.E.; Mondon, J.A. Deriving site-specific water quality criteria for ammonia from national versus international toxicity data. *Ecotoxicol. Environ. Saf.* **2019**, *171*, 665–676. <https://doi.org/10.1016/j.ecoenv.2018.12.078>.
- Li, X.; Yang, Y.; Ahmad, S.; Sun, M.; Zhang, Q. Selection of optimal reference genes for qRT-PCR analysis of shoot development and graviresponse in prostrate and erect chrysanthemums. *PLoS ONE* **2019**, *14*, e0225241. <https://doi.org/10.1371/journal.pone.0225241>.

4. Louren, A.P.; Mackert, A.; Cristino, A. Validation of reference genes for gene expression studies in the honey bee, *apis mellifera*, by quantitative real-time rt-pcr. *Apidologie* **2008**, *39*, 372–385. <https://doi.org/10.1051/apido:2008015>.
